# Supplementary material
Source: Springer Nature journal article supplement (https://www.springermedizin.de/resource/supplementary/13019_2013_1427_MOESM9_ESM.pdf/9640642)
Supplement: MOESM9 [file 9640642]

| Model  | Study name | Statistics for each study |             |             |         |         | Odds ratio and 95% CI |      |      |      |      |      |       |
|--------|------------|---------------------------|-------------|-------------|---------|---------|-----------------------|------|------|------|------|------|-------|
|        |            | Odds ratio                | Lower limit | Upper limit | Z-Value | p-Value | 0.10                  | 0.20 | 0.50 | 1.00 | 2.00 | 5.00 | 10.00 |
|        | hoye       | 0.229                     | 0.163       | 0.321       | -8.516  | 0.000   |                       |      |      |      |      |      |       |
|        | Yixianhua  | 0.256                     | 0.154       | 0.428       | -5.217  | 0.000   |                       |      |      |      |      |      |       |
|        | ivanhoe    | 0.190                     | 0.114       | 0.315       | -6.409  | 0.000   |                       |      |      |      |      |      |       |
|        | aziz       | 0.119                     | 0.060       | 0.235       | -6.112  | 0.000   |                       |      |      |      |      |      |       |
|        | angioi     | 0.344                     | 0.157       | 0.754       | -2.664  | 0.008   |                       |      |      |      |      |      |       |
|        | drozd      | 0.423                     | 0.178       | 1.003       | -1.953  | 0.051   |                       |      |      |      |      |      |       |
|        | noguchi    | 0.183                     | 0.081       | 0.413       | -4.089  | 0.000   |                       |      |      |      |      |      |       |
|        | Finci      | 0.128                     | 0.054       | 0.306       | -4.635  | 0.000   |                       |      |      |      |      |      |       |
|        | olivari    | 0.135                     | 0.052       | 0.351       | -4.106  | 0.000   |                       |      |      |      |      |      |       |
|        | valenti    | 0.206                     | 0.080       | 0.528       | -3.290  | 0.001   |                       |      |      |      |      |      |       |
|        | warren     | 0.205                     | 0.044       | 0.948       | -2.028  | 0.043   |                       |      |      |      |      |      |       |
| Fixed  |            | 0.212                     | 0.175       | 0.257       | -15.787 | 0.000   |                       |      |      |      |      |      |       |
| Random |            | 0.212                     | 0.175       | 0.257       | -15.787 | 0.000   |                       |      |      |      |      |      |       |
